# Supplementary material for: Attentional biases toward body images in males at high risk of muscle dysmorphia
Source: PeerJ journal article supplement (doi:10.7717/peerj.4273), 2018-01-16
Supplement: Supporting_File_S1.pdf [file Supporting_File_S1.pdf]

## 1 **Supporting File S1**

### 2 **Participants Recruiting Procedure**

3 All recruited participants worked out with free weights or machines at least  
4 three times per week. They answered a Chinese version of the Muscle Appearance  
5 Satisfaction Scale (CMASS; Jin et al., 2015) questionnaire. Their total scores on the  
6 CMASS were used to assign them into two groups at higher and lower risk of MD.

7 CMASS is a 17-item self-reported questionnaire, with total scores ranging from  
8 17 to 85. Higher scores on the MASS reflect a tendency towards MD (Babusa et al.,  
9 2012; González-Martí et al., 2012; Mayville et al., 2002; Ryan & Morrison, 2010).  
10 Their total scores on the C MASS were ranked in descending order. Participants  
11 scoring in the top 27% ( $n = 54$ , total scores 51–72) comprised the HRMD group, as  
12 they were considered to be at the highest risk of developing MD, whereas participants  
13 scoring in the bottom 27% ( $n = 54$ , total scores 24–42) comprised the low risk of MD  
14 (LRMD) group (Kelley, 1939).

15 33 participants were recruited from each of the HRMD and LRMD groups for  
16 inclusion in the eye-tracking experiment. One participant did not finish the study,  
17 resulting in a total of 65 participants, who ranged in age from 20 to 33 years (mean,  
18 23.66 years; SD, 2.08 years).

### 19 **Sampling validity**

20 The frequency of exercise as well as the total and subscale CMASS scores  
21 were calculated for both the HRMD and LRMD groups to assess whether the risk of  
22 MD was distinguished in the groups. Results of independent *t*-test showed significant

- 1 difference between both groups ( $p < .0001$ ), indicating the HRMD group (top 27%)
- 2 had more typical characteristics and risk of MD than did the LRMD group (see Table
- 3 S1).
- 4

1 **Table S1**

2 *Comparison with CMASS scores and frequency of exercise between the HRMD and*  
 3 *LRMD groups.*

|                         | Group | N  | Score( $M\pm SD$ ) | Difference in HRMD &LRMD |
|-------------------------|-------|----|--------------------|--------------------------|
|                         |       |    |                    | <i>t</i> -statistics     |
| Muscle Checking         | HRMD  | 54 | 13.33 $\pm$ 2.97   | 10.29 <sup>***</sup>     |
|                         | LRMD  | 54 | 7.91 $\pm$ 2.49    |                          |
| Muscle Satisfaction     | HRMD  | 54 | 11.02 $\pm$ 2.70   | 3.83 <sup>***</sup>      |
|                         | LRMD  | 54 | 9.07 $\pm$ 2.57    |                          |
| Substance Use           | HRMD  | 54 | 9.13 $\pm$ 2.42    | 10.43 <sup>***</sup>     |
|                         | LRMD  | 54 | 4.91 $\pm$ 1.73    |                          |
| Injury                  | HRMD  | 54 | 10.65 $\pm$ 2.42   | 8.80 <sup>***</sup>      |
|                         | LRMD  | 54 | 6.70 $\pm$ 2.24    |                          |
| Bodybuilding Dependence | HRMD  | 54 | 13.87 $\pm$ 2.43   | 12.37 <sup>***</sup>     |
|                         | LRMD  | 54 | 8 $\pm$ 2.50       |                          |
| Total Score             | HRMD  | 54 | 58 $\pm$ 5.47      | 23.00 <sup>***</sup>     |
|                         | LRMD  | 54 | 36.59 $\pm$ 4.11   |                          |
| Frequency of Exercise   | HRMD  | 54 | 4.87 $\pm$ 1.79    | 4.45 <sup>***</sup>      |
|                         | LRMD  | 54 | 3.43 $\pm$ 1.57    |                          |

4 **Note:**

5 HRMD: Higher Risk of Muscle Dysmorphia; LRMD: Lower Risk of Muscle

6 Dysmorphia

1 \*\*\*  $p < .0001$ .

## 2 **References**

- 3 Babusa B, Urbán R, Czeglédi E, Túry, F. 2012. Psychometric properties and  
4 construct validity of the Muscle Appearance Satisfaction Scale among  
5 Hungarian men. *Body Image* 9: 155-162. [DOI 10.1016/j.bodyim.2011.08.005](https://doi.org/10.1016/j.bodyim.2011.08.005)
- 6 González-Martí I, Bustos JGF, Jordán ORC, Mayville, SB. 2012. Validation of a  
7 Spanish version of the Muscle Appearance Satisfaction Scale: Escala de  
8 satisfacción muscular. *Body image*, 9: 517-523.  
9 [DOI 10.1016/j.bodyim.2012.05.002](https://doi.org/10.1016/j.bodyim.2012.05.002)
- 10 Jin X, Jin Y, Zhou S, Li X, Yang SN, Yang D, ... Yao J. 2015. The Muscle Appearance  
11 Satisfaction Scale: A factorial analysis of validity and reliability for its use on  
12 adult Chinese male weightlifters. *Body image*, 14: 94-101. [DOI](https://doi.org/10.1016/j.bodyim.2015.04.004)  
13 [10.1016/j.bodyim.2015.04.004](https://doi.org/10.1016/j.bodyim.2015.04.004)
- 14 Kelley TL. 1939. The selection of upper and lower groups for the validation of test  
15 items. *Journal of Educational Psychology* 30: 17. [DOI 10.1037/h0057123](https://doi.org/10.1037/h0057123)
- 16 Mayville SB, Williamson DA, White MA, Netemeyer RG, Drab DL. 2002.  
17 Development of the Muscle Appearance Satisfaction Scale A Self-Report  
18 Measure for the Assessment of Muscle Dysmorphia Symptoms. *Assessment*, 9:  
19 351-360. [DOI 10.1177/1073191102238156](https://doi.org/10.1177/1073191102238156)
- 20 Ryan TA, Morrison TG. 2010. Psychometric properties of the muscle appearance  
21 satisfaction scale among Irish and British Men. *Body Image*, 7: 246-250. [DOI](https://doi.org/10.1016/j.bodyim.2010.02.008)  
22 [10.1016/j.bodyim.2010.02.008](https://doi.org/10.1016/j.bodyim.2010.02.008)
